# Supplementary material for: Mechanically Resistant Poly(N‐vinylcaprolactam) Microgels with Sacrificial Supramolecular Catechin Hydrogen Bonds
Source: PubMed Central journal article supplement (PMC9036020; doi:10.1002/advs.202104004), 2022-02-20
Supplement: ADVS-9-2104004-s001.pdf [file ADVS-9-2104004-s001.pdf]

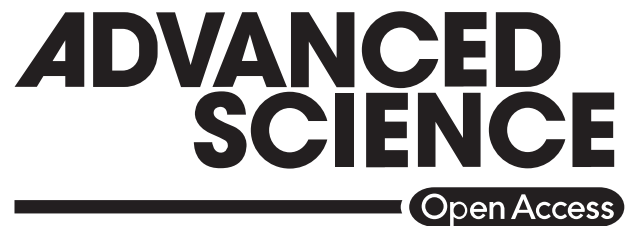

## Supporting Information

for *Adv. Sci.*, DOI 10.1002/adv.202104004

Mechanically Resistant Poly(*N*-vinylcaprolactam) Microgels with Sacrificial Supramolecular Catechin Hydrogen Bonds

*Emilia Izak-Nau, Susanne Braun, Andrij Pich and Robert Göstl\**

Supporting Information for

# Mechanically Resistant Poly(*N*-vinylcaprolactam) Microgels with Sacrificial Supramolecular Catechin Hydrogen Bonds

*Emilia Izak-Nau, Susanne Braun, Andrij Pich, and Robert Göstl\**

E. Izak-Nau, S. Braun, A. Pich, and R. Göstl  
DWI – Leibniz Institute for Interactive Materials  
Forckenbeckstr. 50, 52056 Aachen, Germany  
E-mail: goestl@dwI.rwth-aachen.de

S. Braun, A. Pich  
RWTH Aachen University, Institute of Technical and Macromolecular Chemistry  
Worringerweg 1, 52074 Aachen, Germany

A. Pich  
Maastricht University, Aachen Maastricht Institute for Biobased Materials (AMIBM)  
Brightlands Chemelot Campus, 6167 RD Geleen, The Netherlands

## Table of Contents

|                                                                                    |    |
|------------------------------------------------------------------------------------|----|
| 1. Results and Discussion .....                                                    | 2  |
| 1.1. BIS- and +C-Crosslinked $\mu$ gels .....                                      | 2  |
| 2. Supporting Measurements and Data .....                                          | 3  |
| 2.1. Fourier-Transform Infrared (FTIR) Spectroscopy .....                          | 3  |
| 2.2. Dynamic Light Scattering (DLS).....                                           | 3  |
| 2.3. Quantitative Raman Spectroscopy.....                                          | 4  |
| 2.4. Quantitative $^1\text{H}$ -Nuclear Magnetic Resonance (NMR) Spectroscopy..... | 5  |
| 2.5. Fluorescence Spectroscopy (FS) .....                                          | 9  |
| 2.6. Titrations for pH-Sensitivity.....                                            | 10 |
| 3. References.....                                                                 | 10 |

## 1. Results and Discussion

### 1.1. BIS- and +C-Bonded $\mu$ gels

To compare the results with regular PVCL-based  $\mu$ gels crosslinked with 0.5 mol% BIS instead of OFP,  $\mu$ gels were sonicated for the same duration.  $\mu$ gels crosslinked only with BIS showed a core corona structure with a more crosslinked core and a less crosslinked corona. For those  $\mu$ gels a fast decrease of the size was observed, because the loosely crosslinked corona was degraded by sonication. This was followed by a strong aggregation of the  $\mu$ gels after 2.5 min of sonication time.<sup>[1]</sup> The observed trends for the  $\mu$ gels crosslinked with BIS and +C were comparable to those obtained for only +C-crosslinked  $\mu$ gels (Figure S1). In general, the  $\mu$ gels appeared to be slightly more resistant to shear force than those crosslinked *via* +C only, but not as stable as the  $\mu$ gels crosslinked with OFP and +C. The  $\mu$ gels crosslinked with 0.5 mol% BIS and 15 mol% +C showed no changes in their size within a sonication time of 20 min. However, the  $\mu$ gels composed of 0.5 mol% BIS and 5 mol% +C as well as 10 mol% of +C were less stable than those with 0.5 mol% OFP instead of BIS. This indicated that the OFP molecules additionally increased the mechanical stability of the  $\mu$ gels.

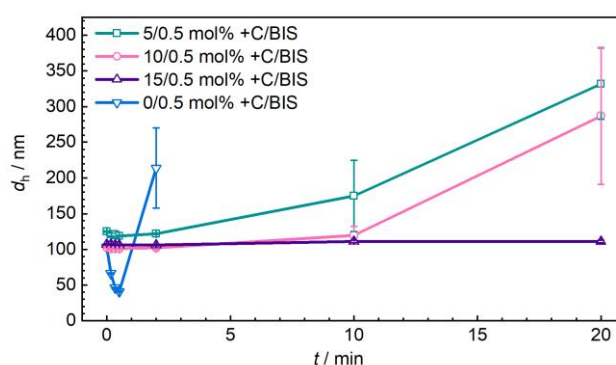

**Figure S1.** Hydrodynamic diameters  $d_h$  gathered from DLS intensity-weighted distributions at  $T = 25\text{ }^\circ\text{C}$  of PVCL  $\mu$ gels bonded with +C (0, 5, 10, and 15 mol%) and BIS crosslinker (0.5 mol%) over the course of sonication time. Mean values  $\pm$  SD from the mean.  $N = 3$  independent measurements for each data point.

## 2. Supporting Measurements and Data

### 2.1. Fourier-Transform Infrared (FTIR) Spectroscopy

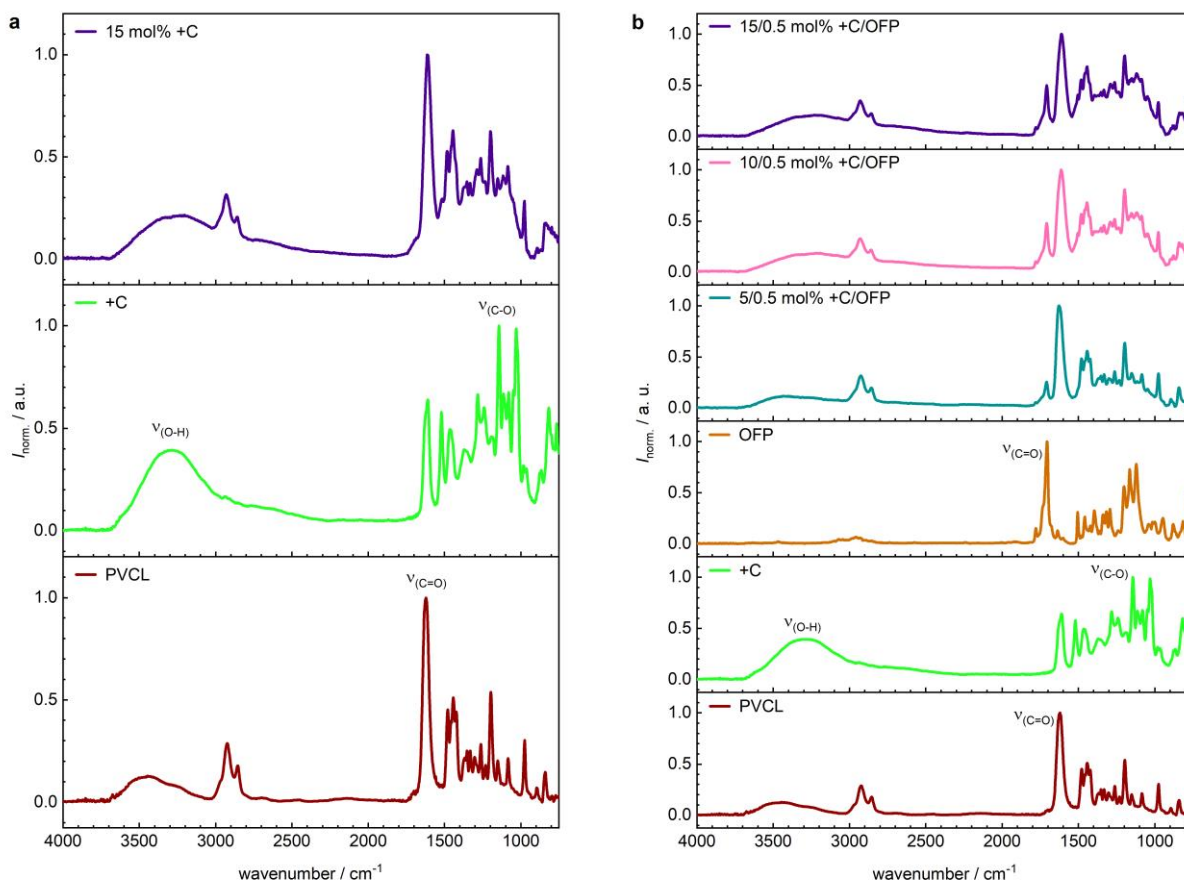

**Figure S2.** Stacks of FTIR spectra of  $\mu$ gels bonded with (a) +C and associated starting material references and (b) +C and OFP crosslinker including associated starting material references.

### 2.2. Dynamic Light Scattering (DLS)

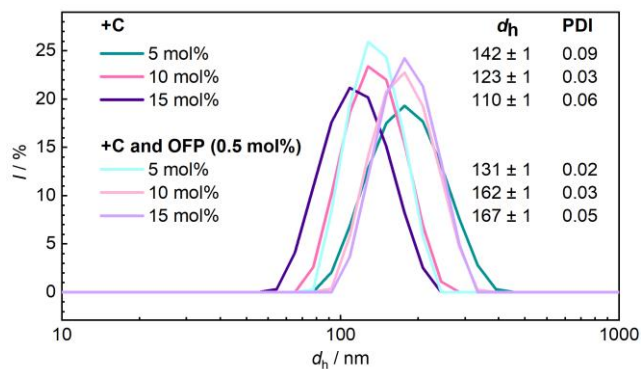

**Figure S3.** DLS intensity-weighted distributions at  $T = 25$  °C of PVCL  $\mu$ gels bonded only with +C and those with +C together with OFP crosslinker. Mean values  $\pm$  SD from the mean.  $N = 3$  independent measurements for each data point.

### 2.3. Quantitative Raman Spectroscopy

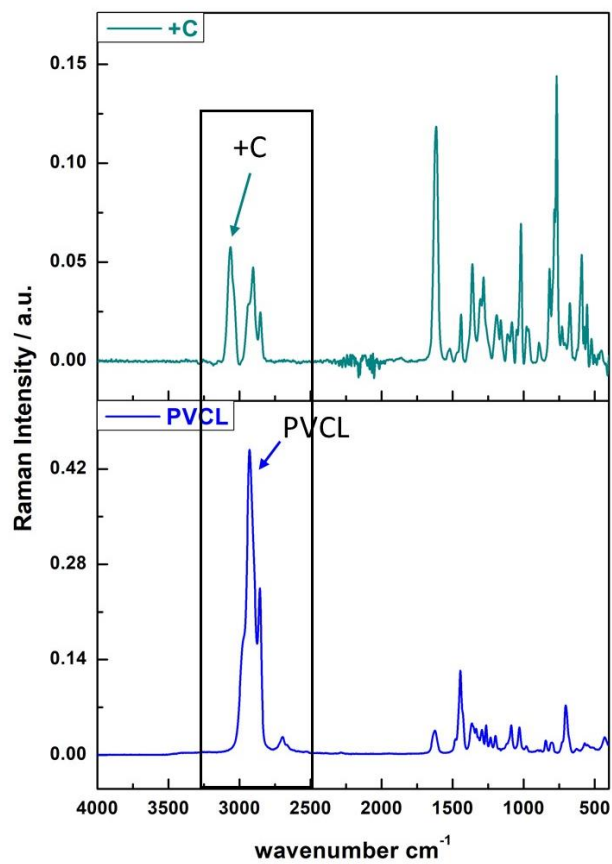

**Figure S4.** Raman spectra of pure calibration samples (linear PVCL chains and +C).

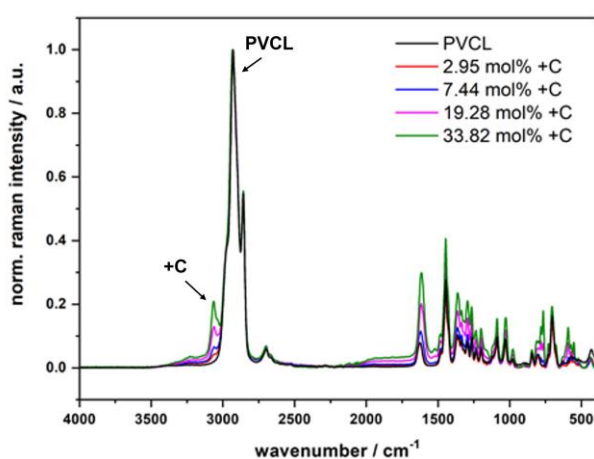

**Figure S5.** Raman spectra of sample mixtures of linear PVCL and defined amounts of +C to obtain a calibration curve to calculate the +C content in the  $\mu\text{gels}$ .

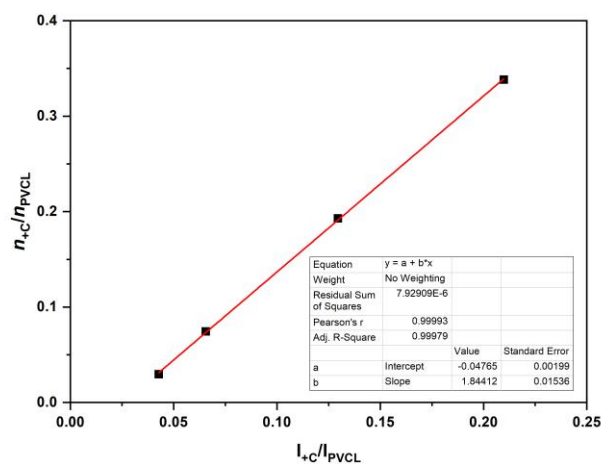

**Figure S6.** Calibration curve obtained by Raman spectroscopy to calculate the +C content in the  $\mu$ gels.

**Table S1.** Incorporated fraction of +C within PVCL/BIS/+C- $\mu$ gels with a BIS content of 0.5 mol% determined by Raman spectroscopy.

| $\mu$ gel sample   | +C / mol% |
|--------------------|-----------|
| 5/0.5 mol% +C/BIS  | 14.12     |
| 10/0.5 mol% +C/BIS | 19.32     |
| 15/0.5 mol% +C/BIS | 25.11     |

## 2.4. Quantitative $^1\text{H}$ -Nuclear Magnetic Resonance (NMR) Spectroscopy

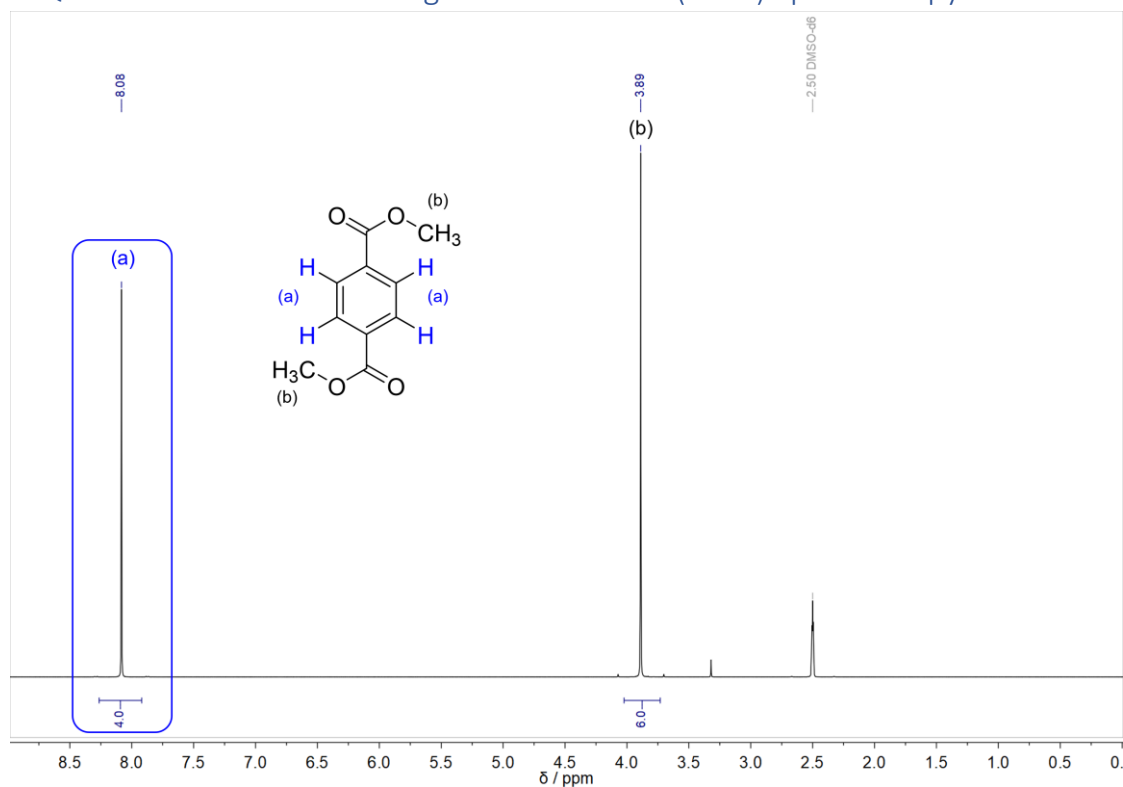

**Figure S7.**  $^1\text{H}$ -NMR spectrum of the internal standard DMT measured in  $\text{DMSO-d}_6$ . Highlighted is the signal of the aromatic protons used for the calculation of the +C content.

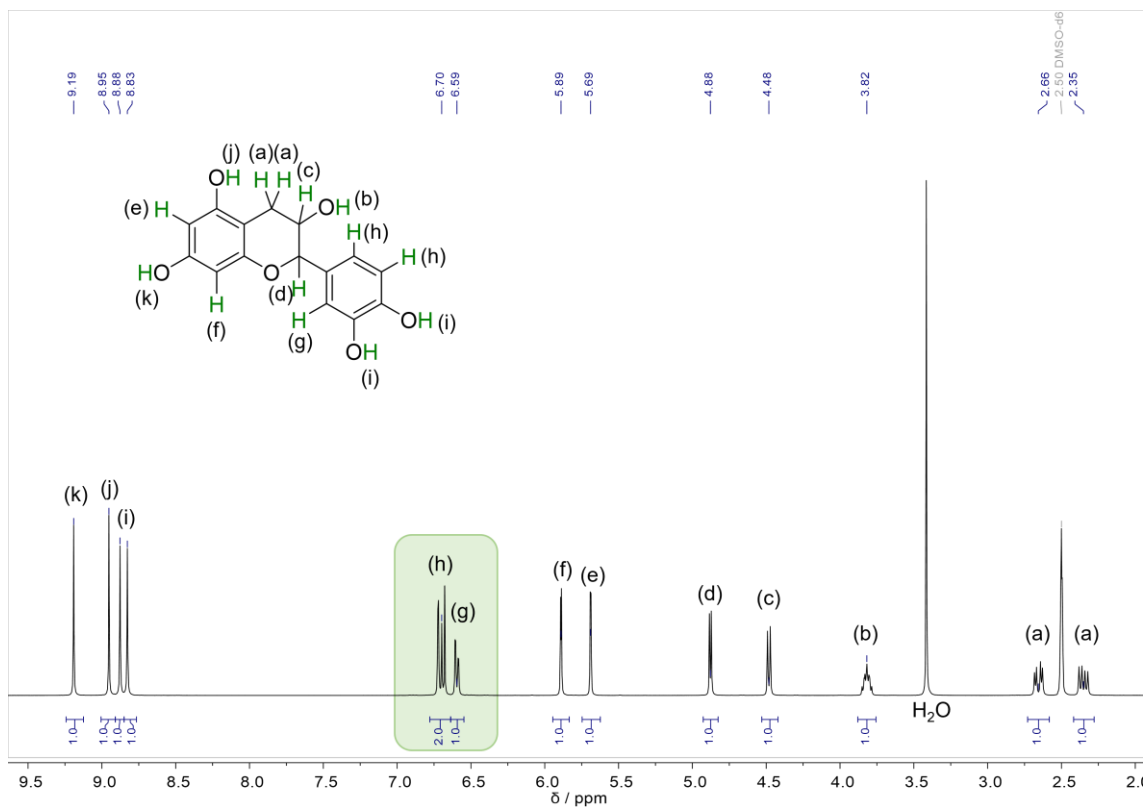

**Figure S8.** <sup>1</sup>H-NMR spectrum of +C measured in DMSO-d<sub>6</sub>. Highlighted are the signals of the aromatic protons used for the calculation of the +C content.

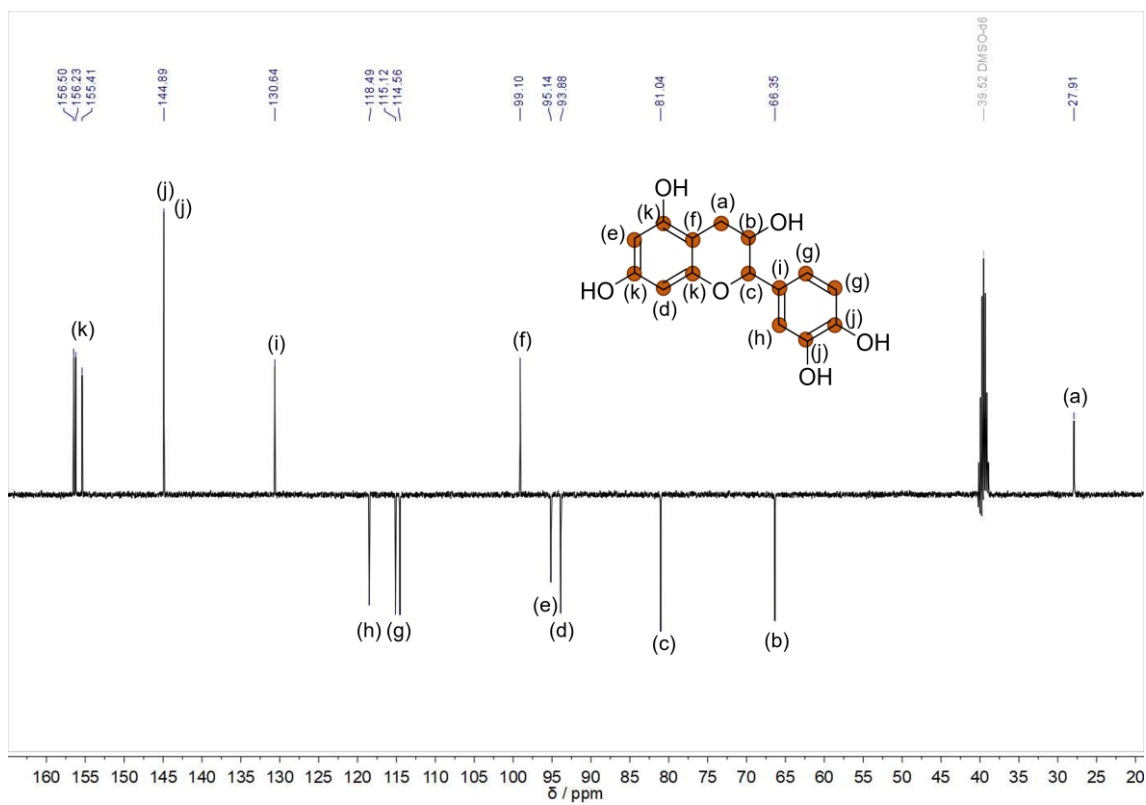

**Figure S9.** <sup>13</sup>C-NMR spectrum of +C measured in DMSO-d<sub>6</sub>.

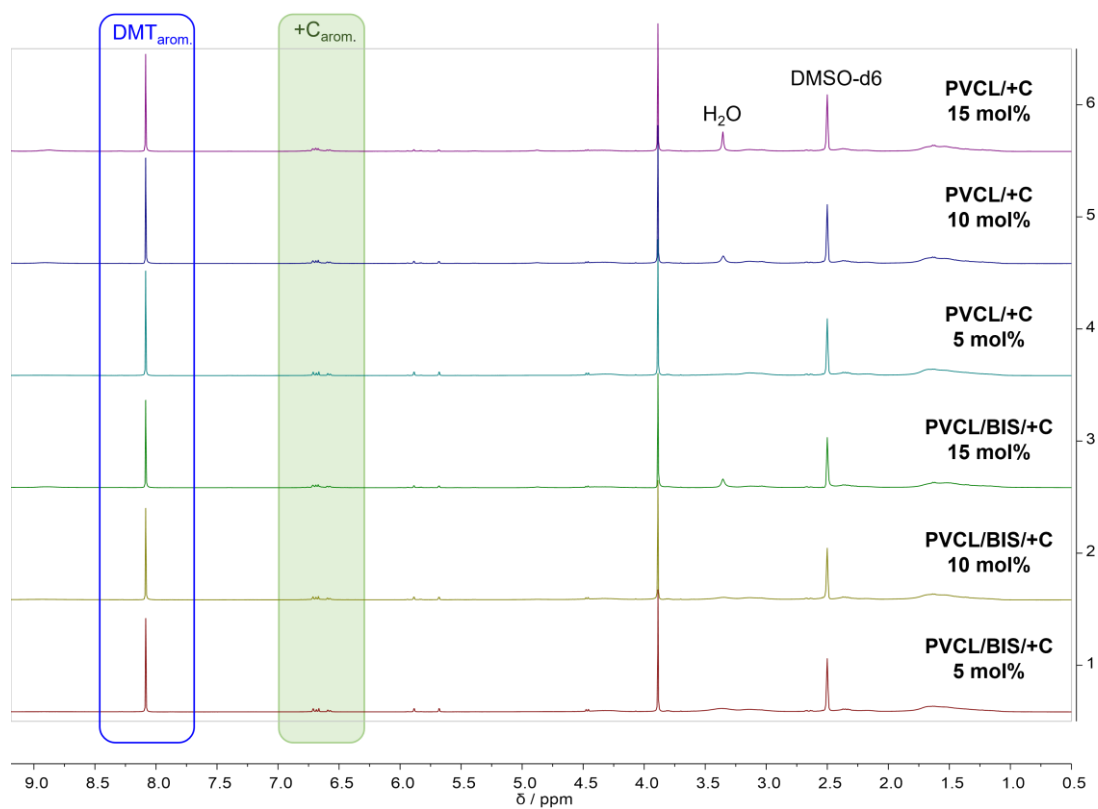

**Figure S10.** Stacked  $^1\text{H}$ -NMR spectra of  $\mu$ gels bonded with supramolecular +C and  $\mu$ gels crosslinked with BIS and +C measured in  $\text{DMSO-d}_6$  containing the internal standard DMT. Highlighted are the signals of the aromatic protons of the DMT and the +C used for the calculation of the crosslinker content.

**Table S2.** Incorporated fraction of +C within PVCL/BIS/+C  $\mu$ gels with a BIS content of 0.5 mol% determined by quantitative  $^1\text{H}$ -NMR spectroscopy.

| $\mu$ gel sample   | +C / wt% | +C / mol% |
|--------------------|----------|-----------|
| 5/0.5 mol% +C/BIS  | 24.6     | 13.53     |
| 10/0.5 mol% +C/BIS | 32.5     | 18.74     |
| 15/0.5 mol% +C/BIS | 35.4     | 20.84     |



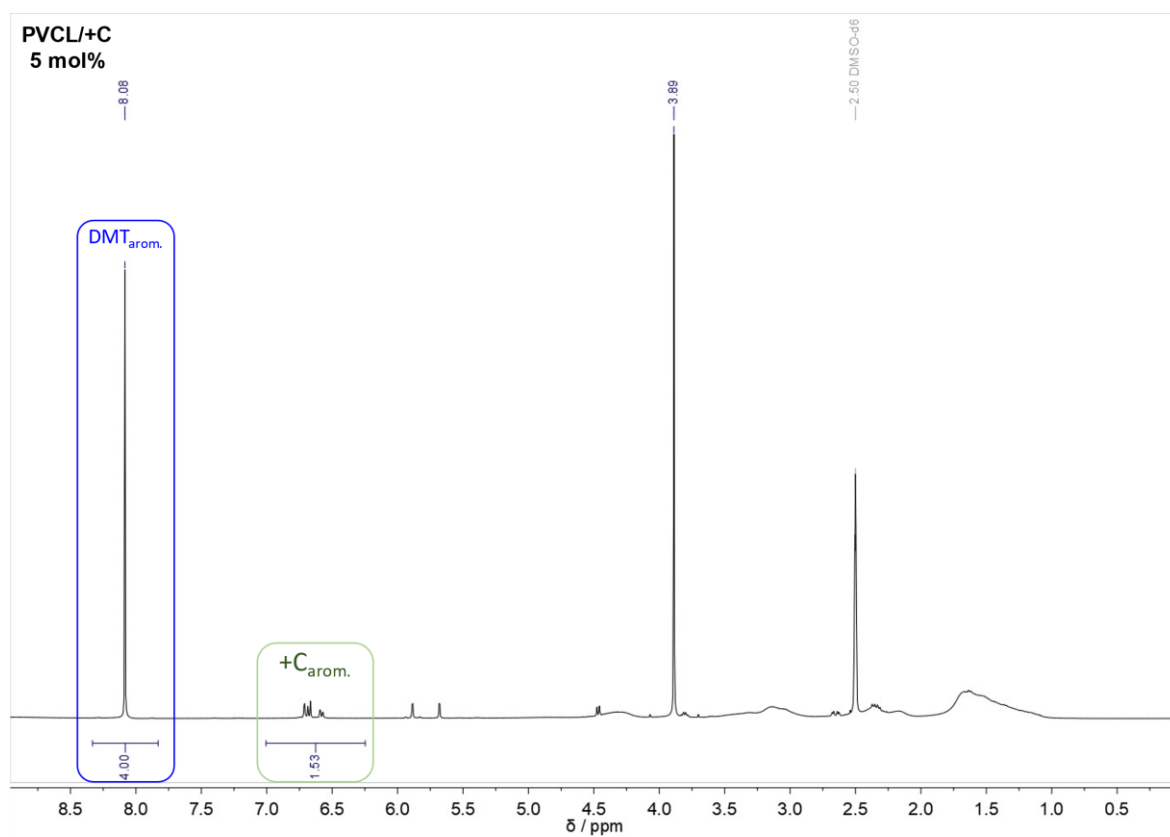

**Figure S11.** Exemplary  $^1\text{H}$ -NMR spectrum of PVCL/+C  $\mu\text{gels}$  measured in  $\text{DMSO-d}_6$  containing the internal standard DMT. Highlighted are the signals of the aromatic protons of DMT and +C used for the calculation of the +C content.

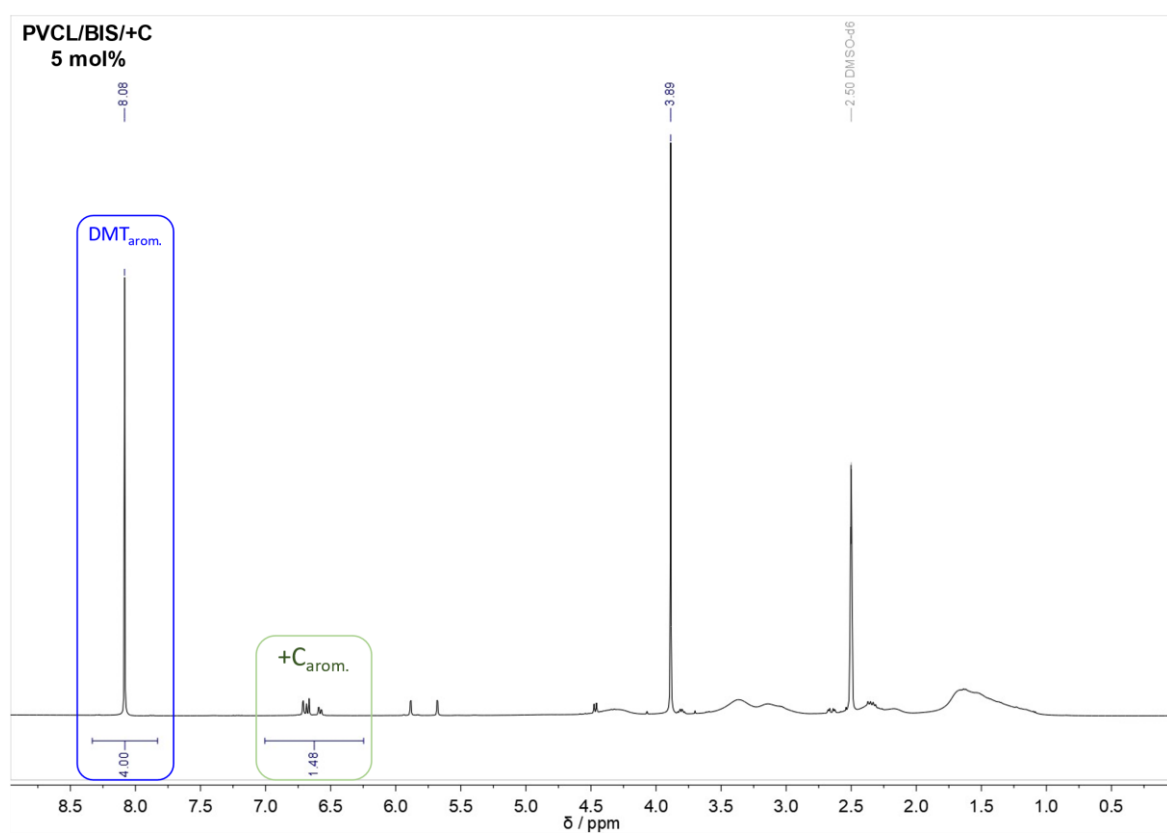

**Figure S12.** Exemplary  $^1\text{H}$ -NMR spectrum of PVCL/BIS/+C  $\mu\text{gels}$  measured in  $\text{DMSO-d}_6$  containing the internal standard DMT. Highlighted are the signals of the aromatic protons of DMT and +C used for the calculation of the physical crosslinker content.

## 2.5. Fluorescence Spectroscopy (FS)

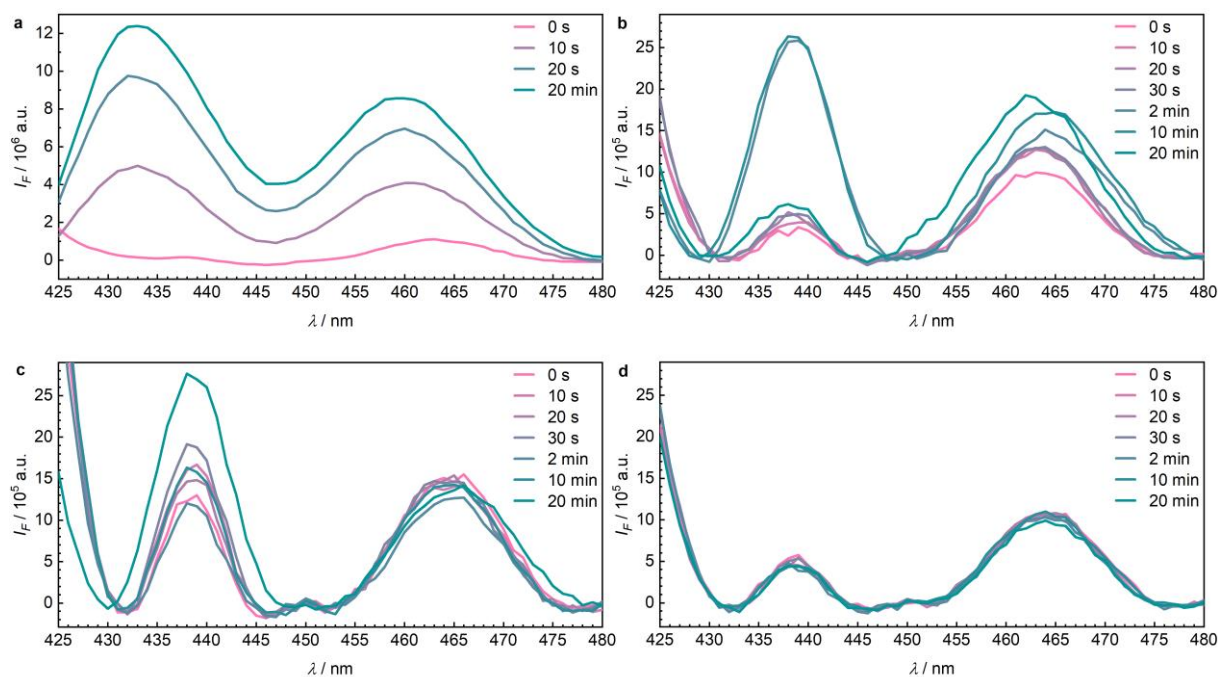

**Figure S13.** Fluorescence intensity  $I_F$  for  $\mu$ gels bonded with +C and OFP crosslinker (0.5 mol%) over the course of the sonication. (a) +C (0 mol%), (b) +C (5 mol%), (c) +C (10 mol%), and (d) +C (15 mol%).

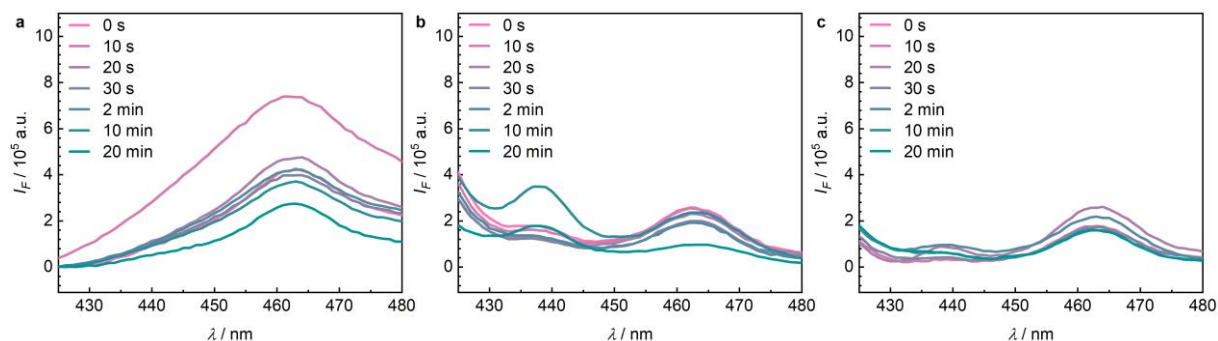

**Figure S14.** Fluorescence intensity  $I_F$  for  $\mu$ gels bonded with +C over the course of the sonication. (a) 5 mol%, (b) 10 mol%, and (c) 15 mol%.

## 2.6. Titrations for pH-Sensitivity

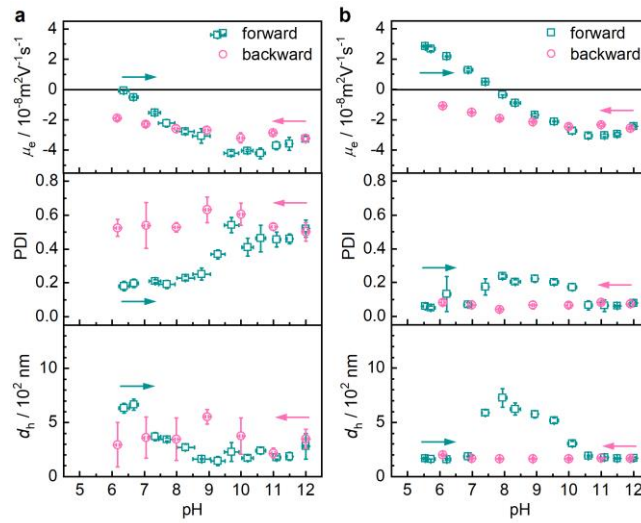

**Figure S15.** pH-sensitivity of  $\mu$ gels under alkaline conditions.  $d_h$ , PDI, and  $\mu_e$  for  $\mu$ gels crosslinked with (a) +C (5 mol%) and (b) +C (5 mol%) and OFP (0.5 mol%).

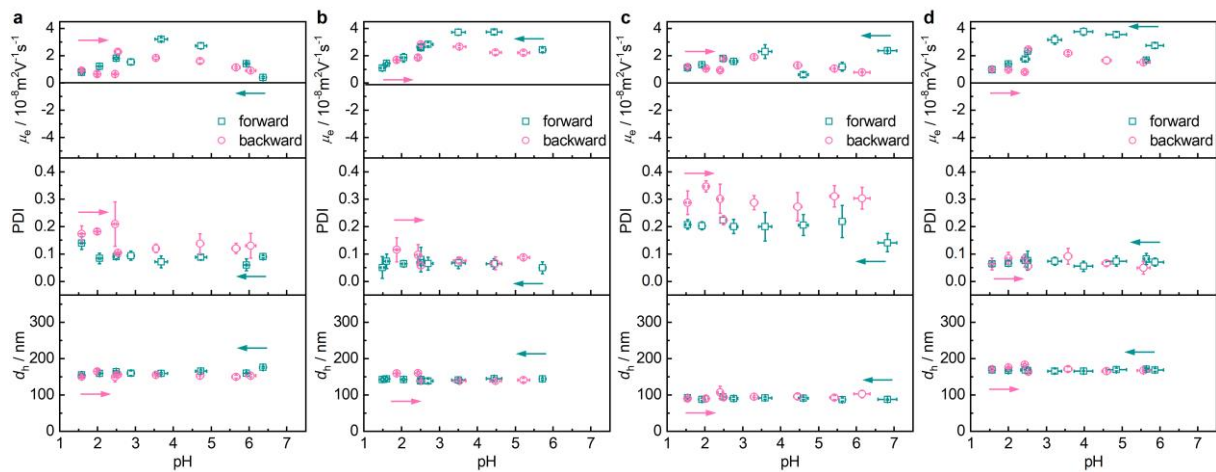

**Figure S16.** pH-sensitivity of  $\mu$ gels under acidic conditions.  $d_h$ , PDI, and  $\mu_e$  for  $\mu$ gels crosslinked with (a) +C (15 mol%), (b) +C (15 mol%) and OFP (0.5 mol%), (c) +C (5 mol%), and (d) +C (5 mol%) and OFP (0.5 mol%).

## 3. References

- [1] E. Izak-Nau, D. E. Demco, S. Braun, C. Baumann, A. Pich, R. Göstl, *ACS Appl. Polym. Mater.* **2020**, *2*, 1682-1691.
